# Supplementary material
Source: Springer Nature journal article supplement (https://www.springermedizin.de/resource/supplementary/13256_2011_1864_MOESM7_ESM.pdf/9648632)
Supplement: MOESM7 [file 9648632]



This histological image shows a cross-section of skin. At the top, the epidermis is visible as a thin, multi-layered pink structure. Below it is a layer of adipose tissue, characterized by large, clear, circular spaces. A large, dense, pinkish-purple mass, identified as a tumor, is situated in the lower right portion of the image, extending into the adipose tissue. The tumor has a complex, irregular internal structure with many small, dark spots. The overall image is stained with hematoxylin and eosin (H&E), giving it a pink and purple color palette.

Epidermis

Adipose  
tissue

Tumor
